# Supplementary material for: New inductively coupled plasma for atomic spectrometry: the microwave-sustained, inductively coupled, atmospheric-pressure plasma (MICAP)
Source: Royal Society of Chemistry journal article supplement (doi:10.1039/c5ja00418g), 2015-11-13
Supplement: c5ja00418g2.pdf [file c5ja00418g2.pdf]

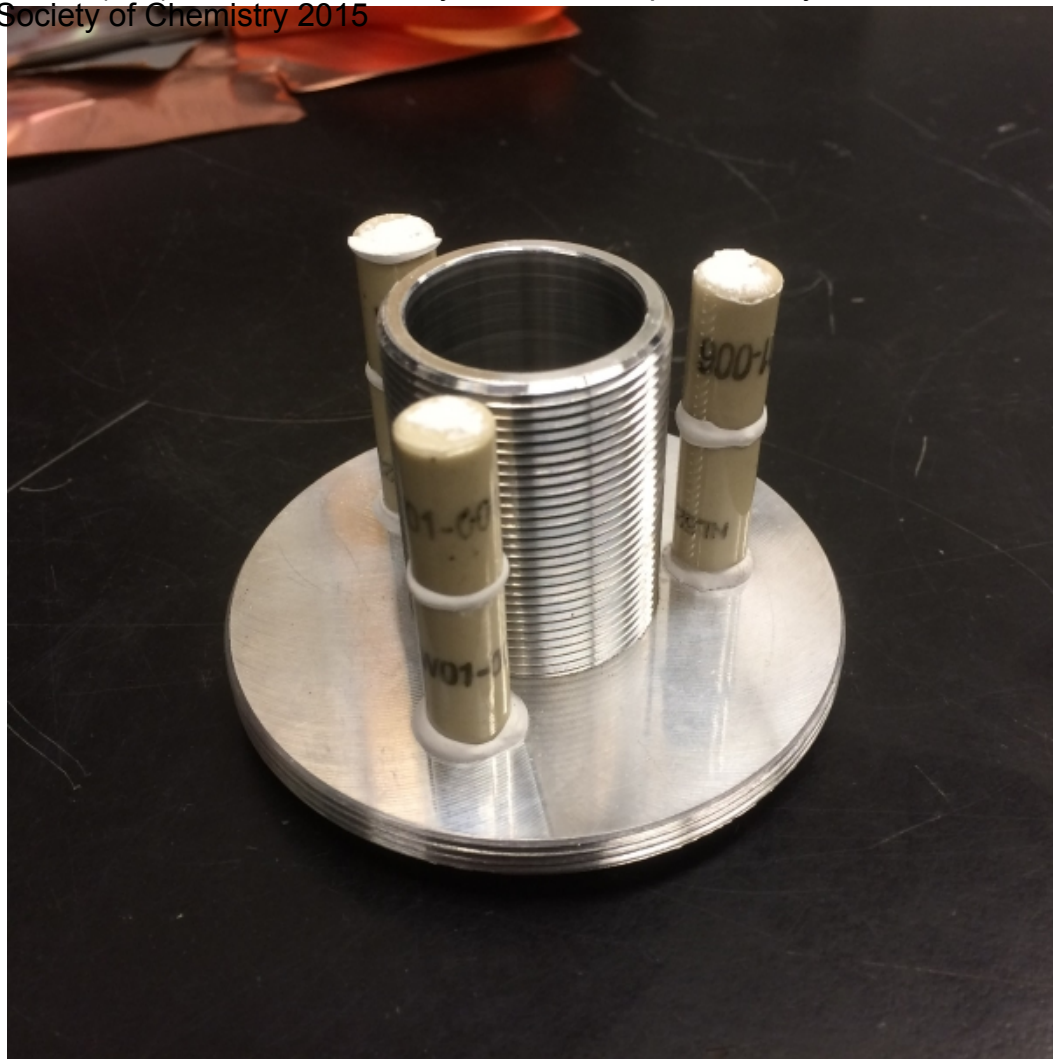

**ESI 1.** Photograph of threaded aluminum tube used for tuning the dielectric resonator. The resonator ring would be mounted above the aluminum tuning tube, upon the three ceramic pillars. Adjustment of the distance between the aluminum tube and the dielectric resonator enables tuning of its natural resonant frequency.

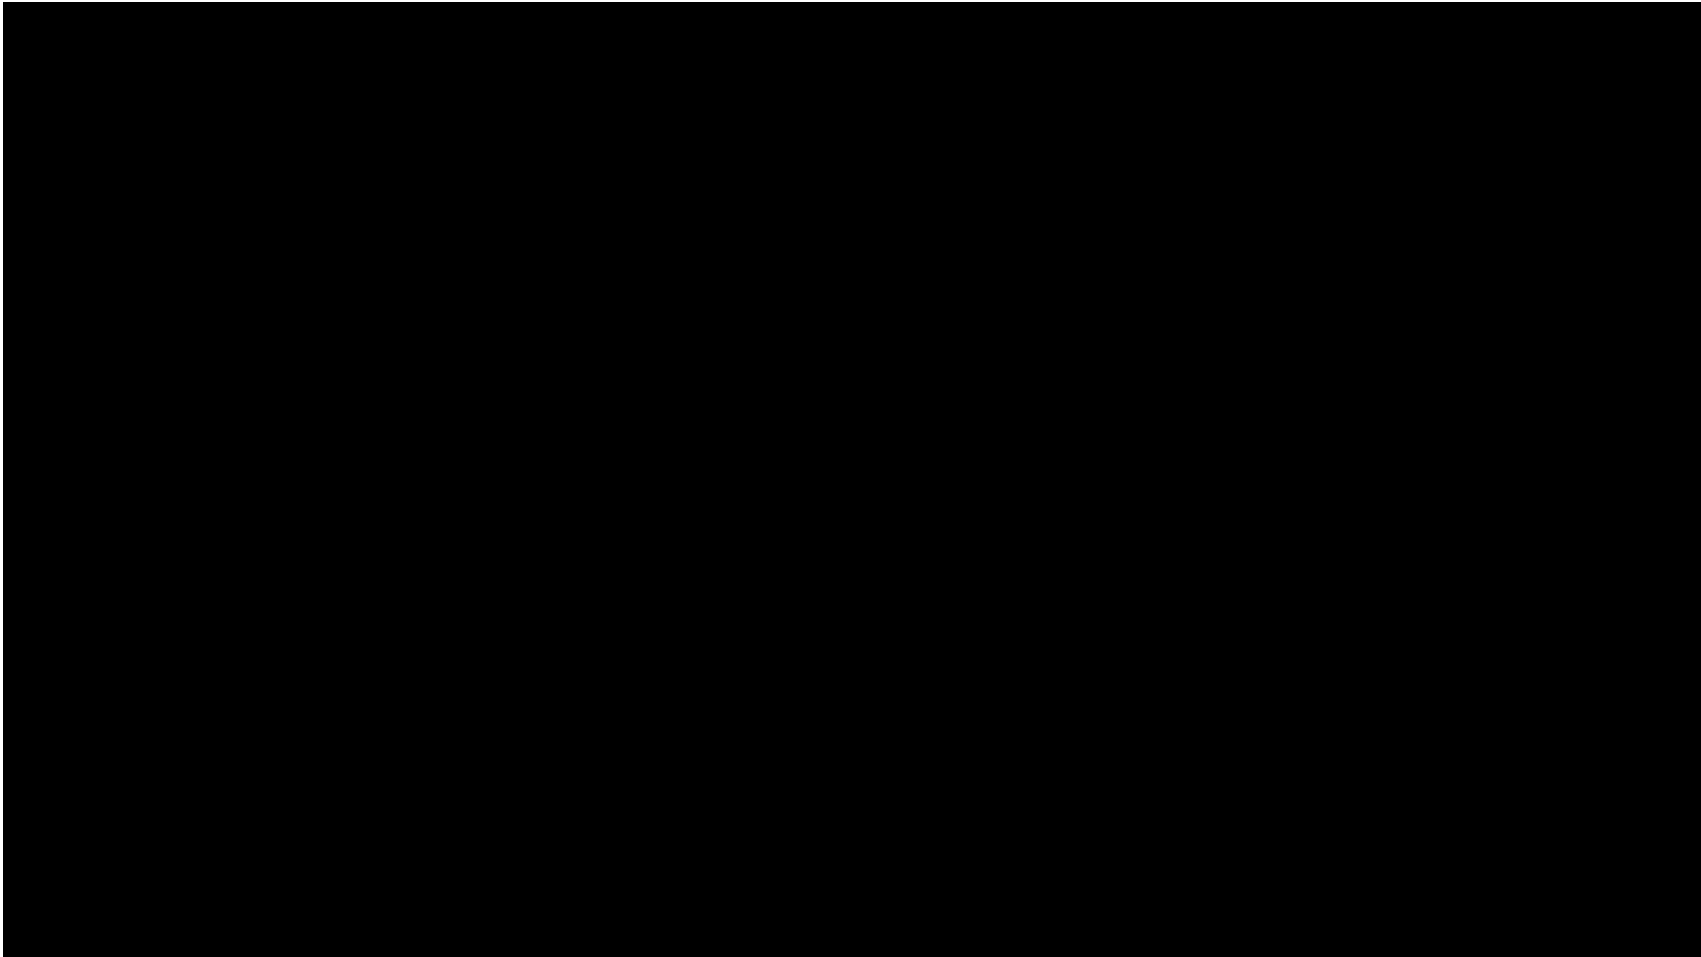

**ESI 2.** Video demonstration of the MICAP ignition procedure.

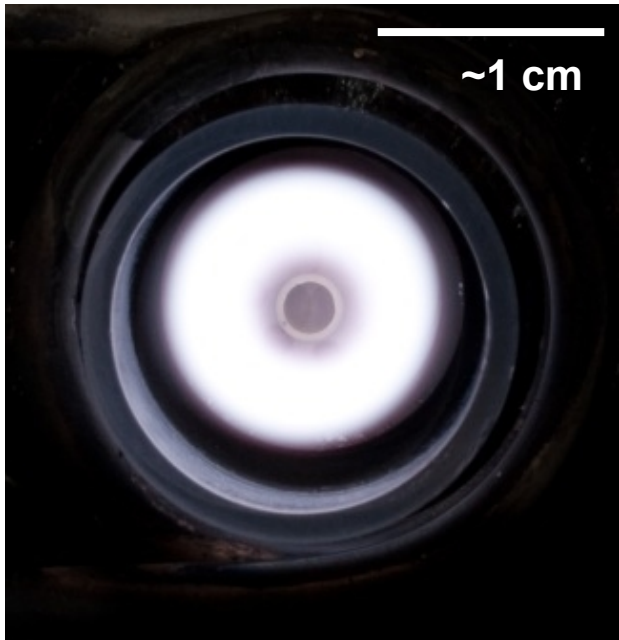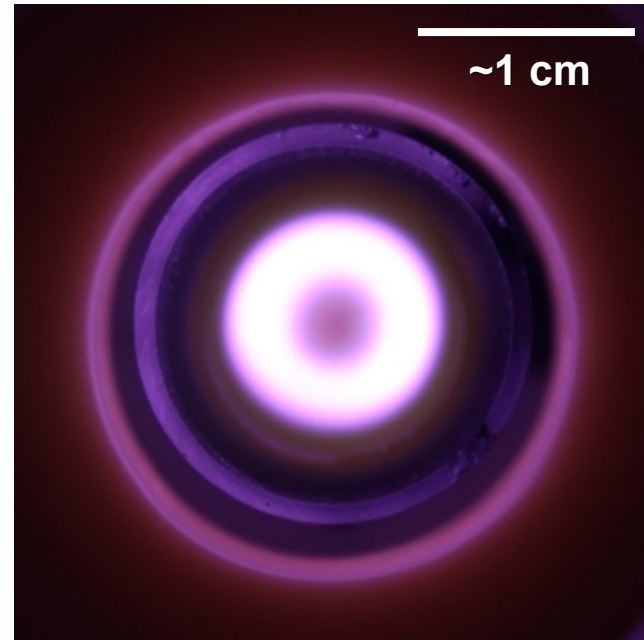

**ESI 3.** Comparison of the argon ICP (left) and nitrogen MICAP (right) structures. Note the similar diameter of the central channel in the two photographs.

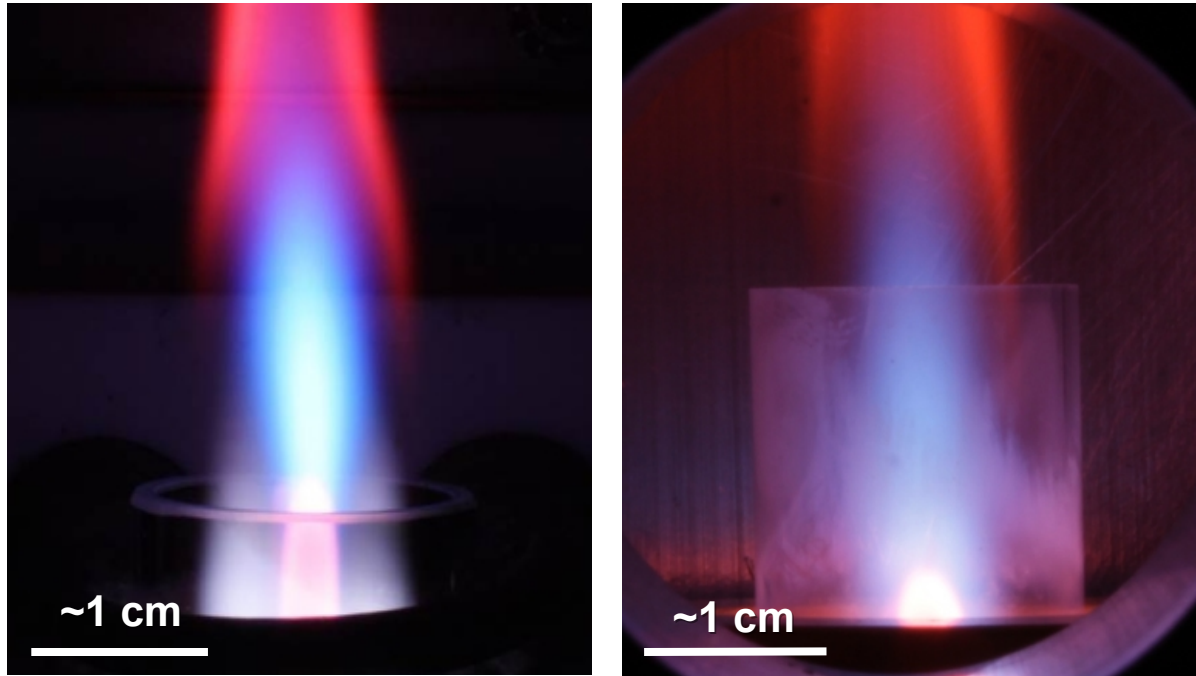

**ESI 4.** Yttrium bullet test for the argon ICP (left) and the nitrogen MICAP (right). Note the close similarity in the plasma structure and position of the radiation zones.
